# Supplementary material for: Efficient ethylene purification by a robust ethane-trapping porous organic cage
Source: Research Square preprint supplement (doi:10.21203/rs.3.rs-98247/v1), 2020-11-04
Supplement: Supplementary file 1 [file 8a86885df63fffc6f08574b6.docx]

Supplementary Information

**Efficient ethylene purification by a robust ethane-trapping porous organic cage**

Kongzhao Su1,2,4, Wenjing Wang1,4, Shunfu Du1,3, Chunqing Ji1,2 & Daqiang Yuan1,2,*

1State Key Laboratory of Structure Chemistry, Fujian Institute of Research on the Structure of Matter, Chinese Academy of Sciences, Fuzhou, 350002 Fujian, China

2University of the Chinese Academy of Sciences, Beijing, 100049, China

3College of Chemistry, Fuzhou University, Fuzhou, 350116, China

4These authors contributed equally

Corresponding author. *E-mail address*: [ydq@fjirsm.ac.cn](mailto:ydq@fjirsm.ac.cn) (D.Q. Yuan).


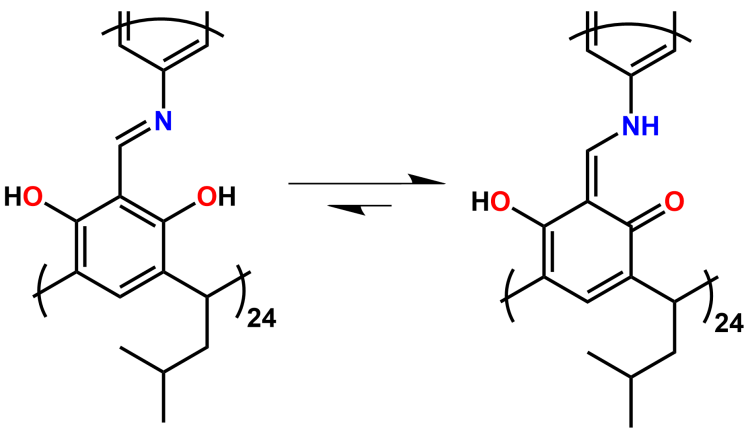


**Supplementary Fig. 1** Keto–enol tautomerization within **CPOC-1**.


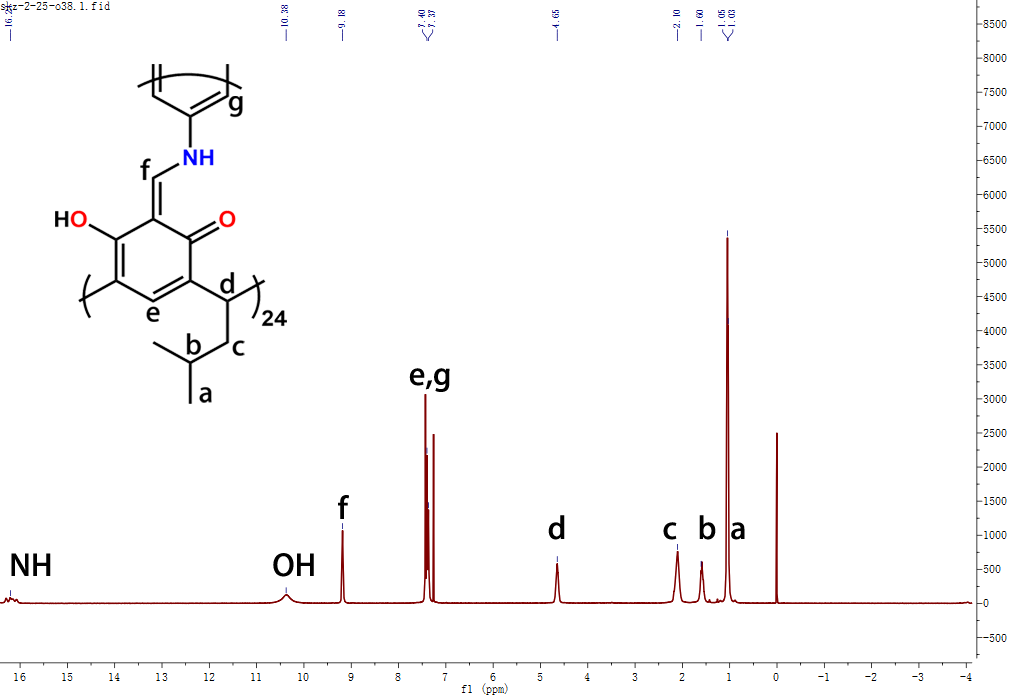


**Supplementary Fig. 2** 1HNMR of **CPOC-1** (CDCl3, 400 MHz, 298 K).


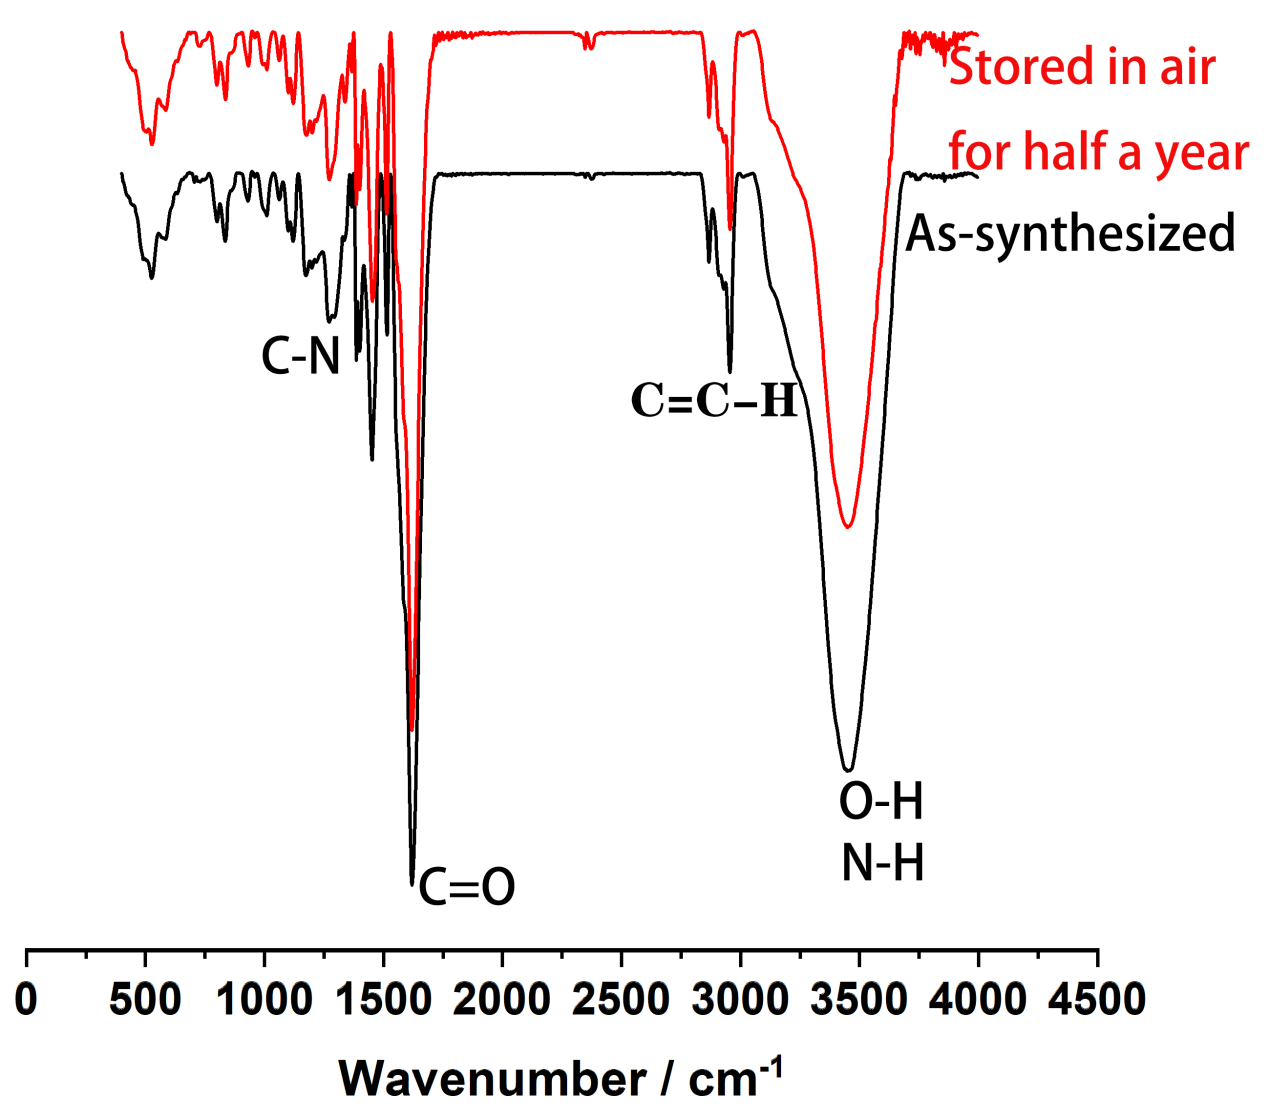


**Supplementary Fig. 3** FT-IR spectra of **CPOC-1**.


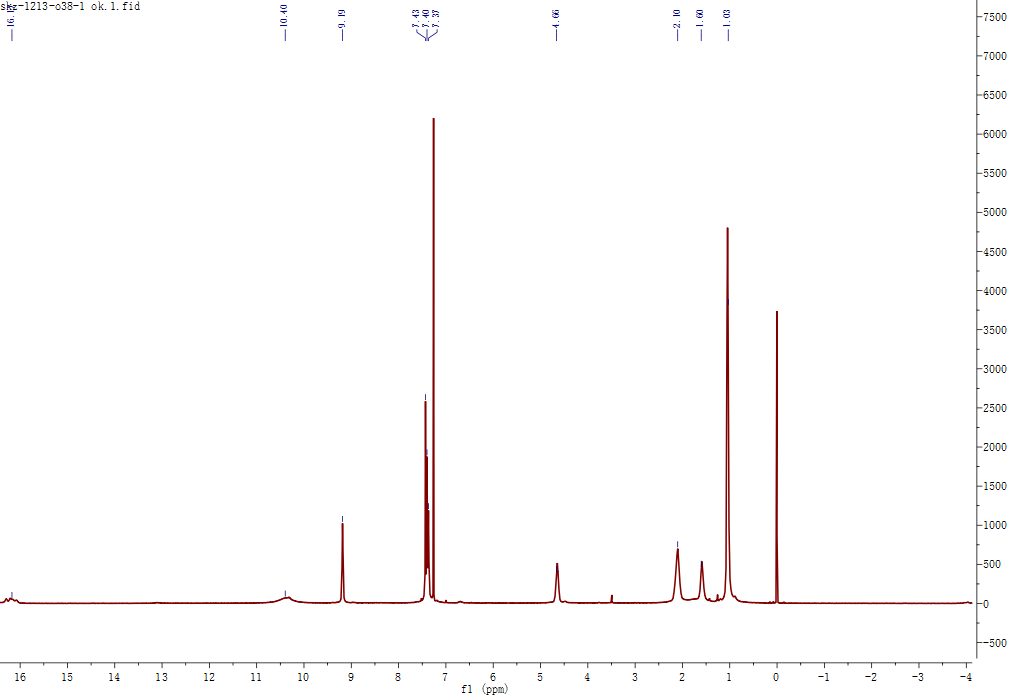


**Supplementary Fig. 4** 1HNMR of **CPOC-1** after storing in air for half a year (CDCl3, 400 MHz, 298 K).





**Supplementary Fig. 5** TGA curve of **CPOC-1**.





**Supplementary Fig. 6** PXRD pattern of **CPOC-1**.


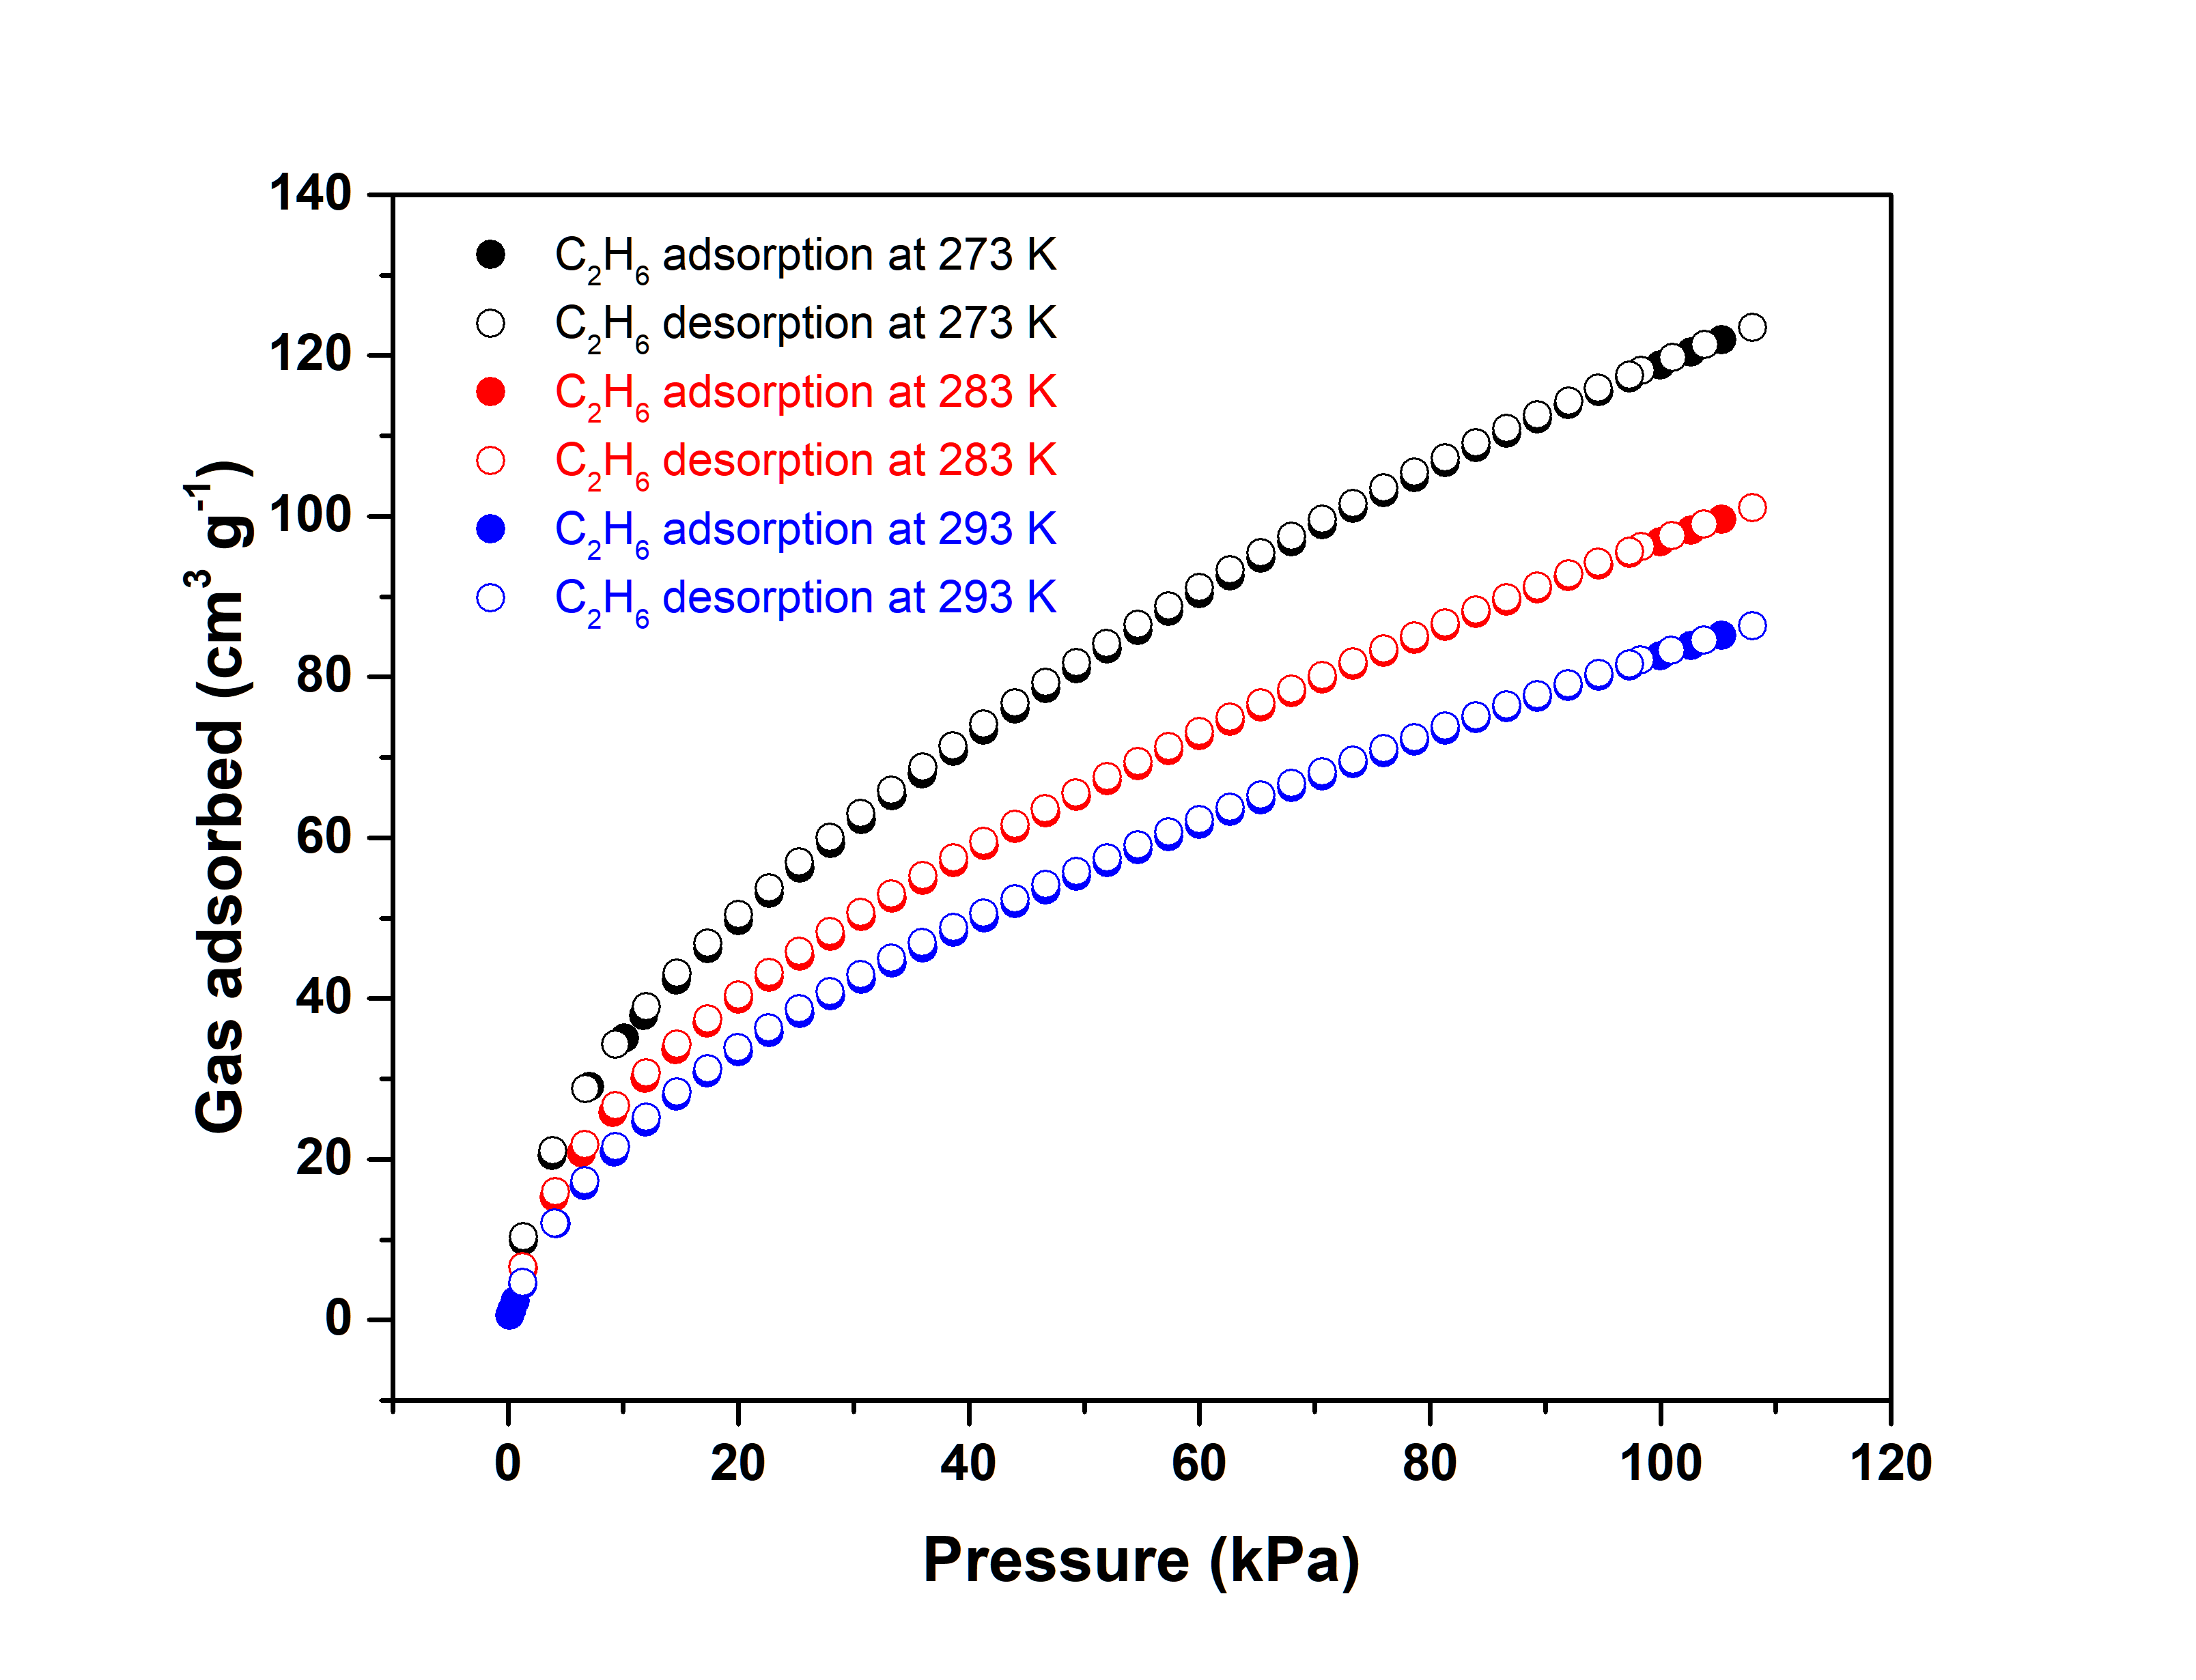


**Supplementary Fig. 7** C2H6 adsorption/desorption isotherm of **CPOC-301** at 273, 283 and 293 K.


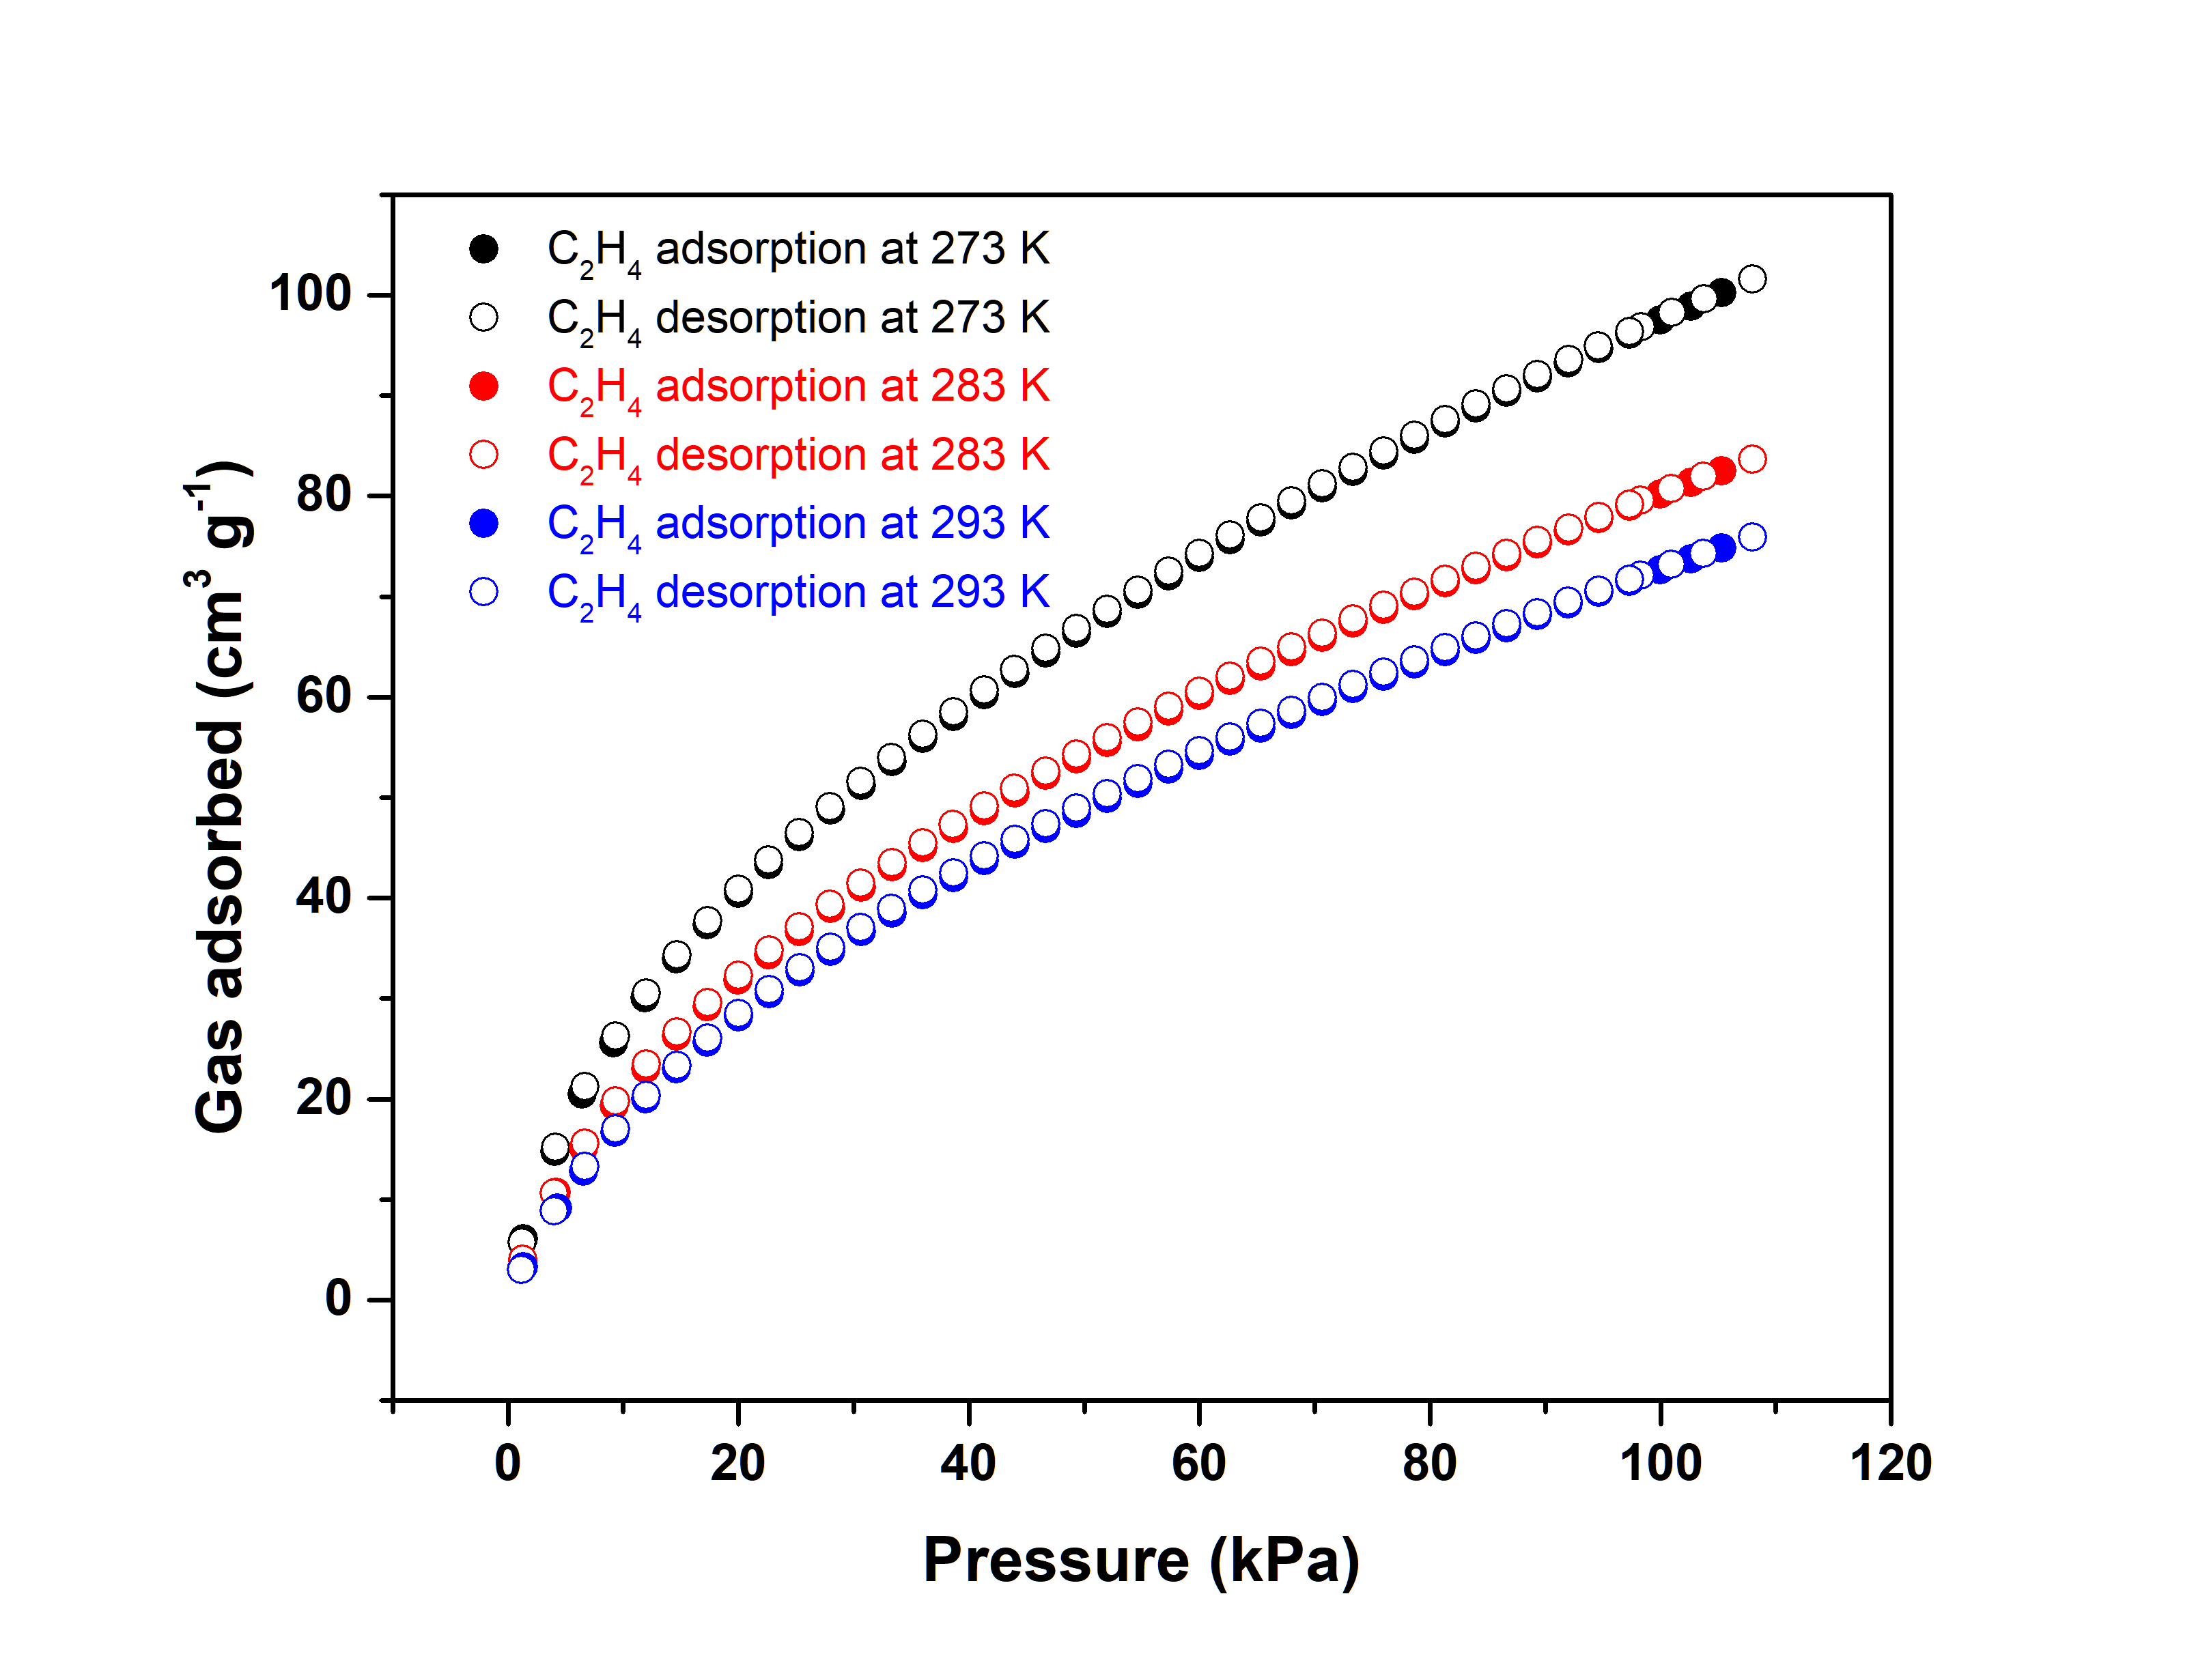


**Supplementary Fig. 8** C2H4 adsorption/desorption isotherm of **CPOC-301** at 273, 283 and 293 K.


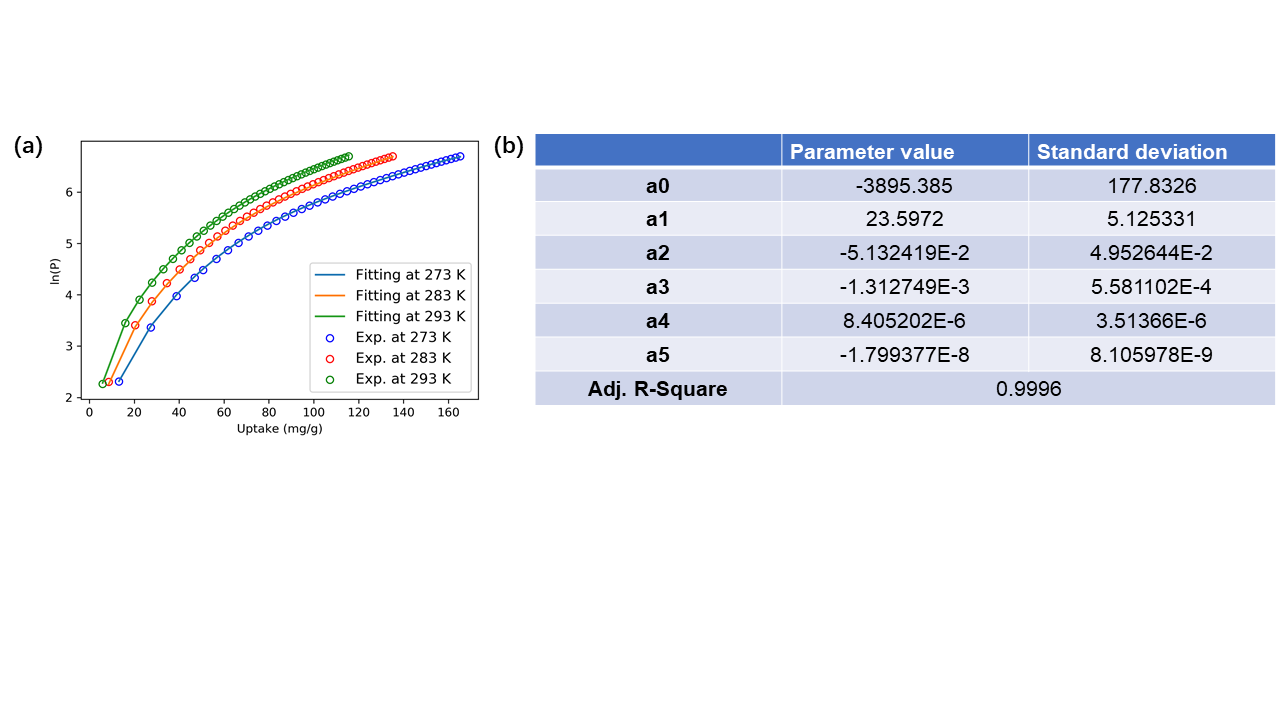


**Supplementary Fig. 9** (a) Virial equation fitting of the C2H6 adsorption isotherm of **CPOC-301** at 273, 283 and 293 K. (b) Relevant fitting parameters for C2H6.


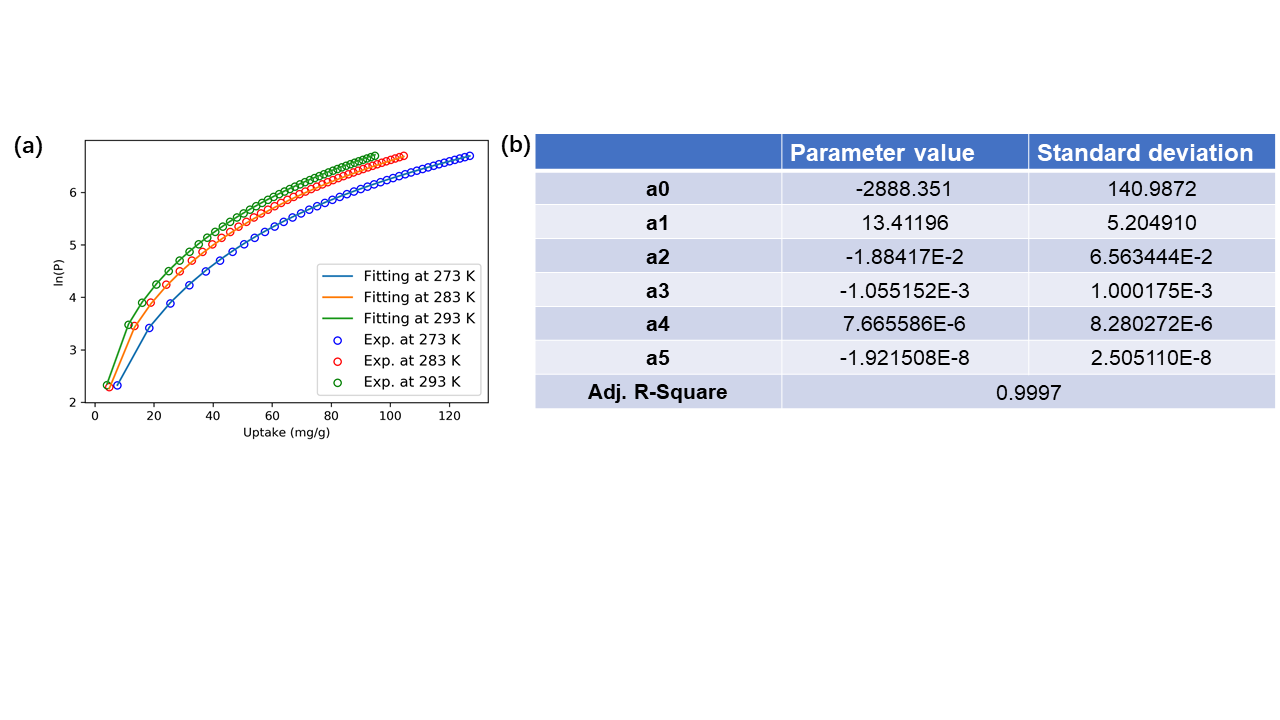


**Supplementary Fig. 10** (a) Virial equation fitting of the C2H4 adsorption isotherm of **CPOC-301** at 273, 283 and 293 K. (b) Relevant fitting parameters for C2H4.


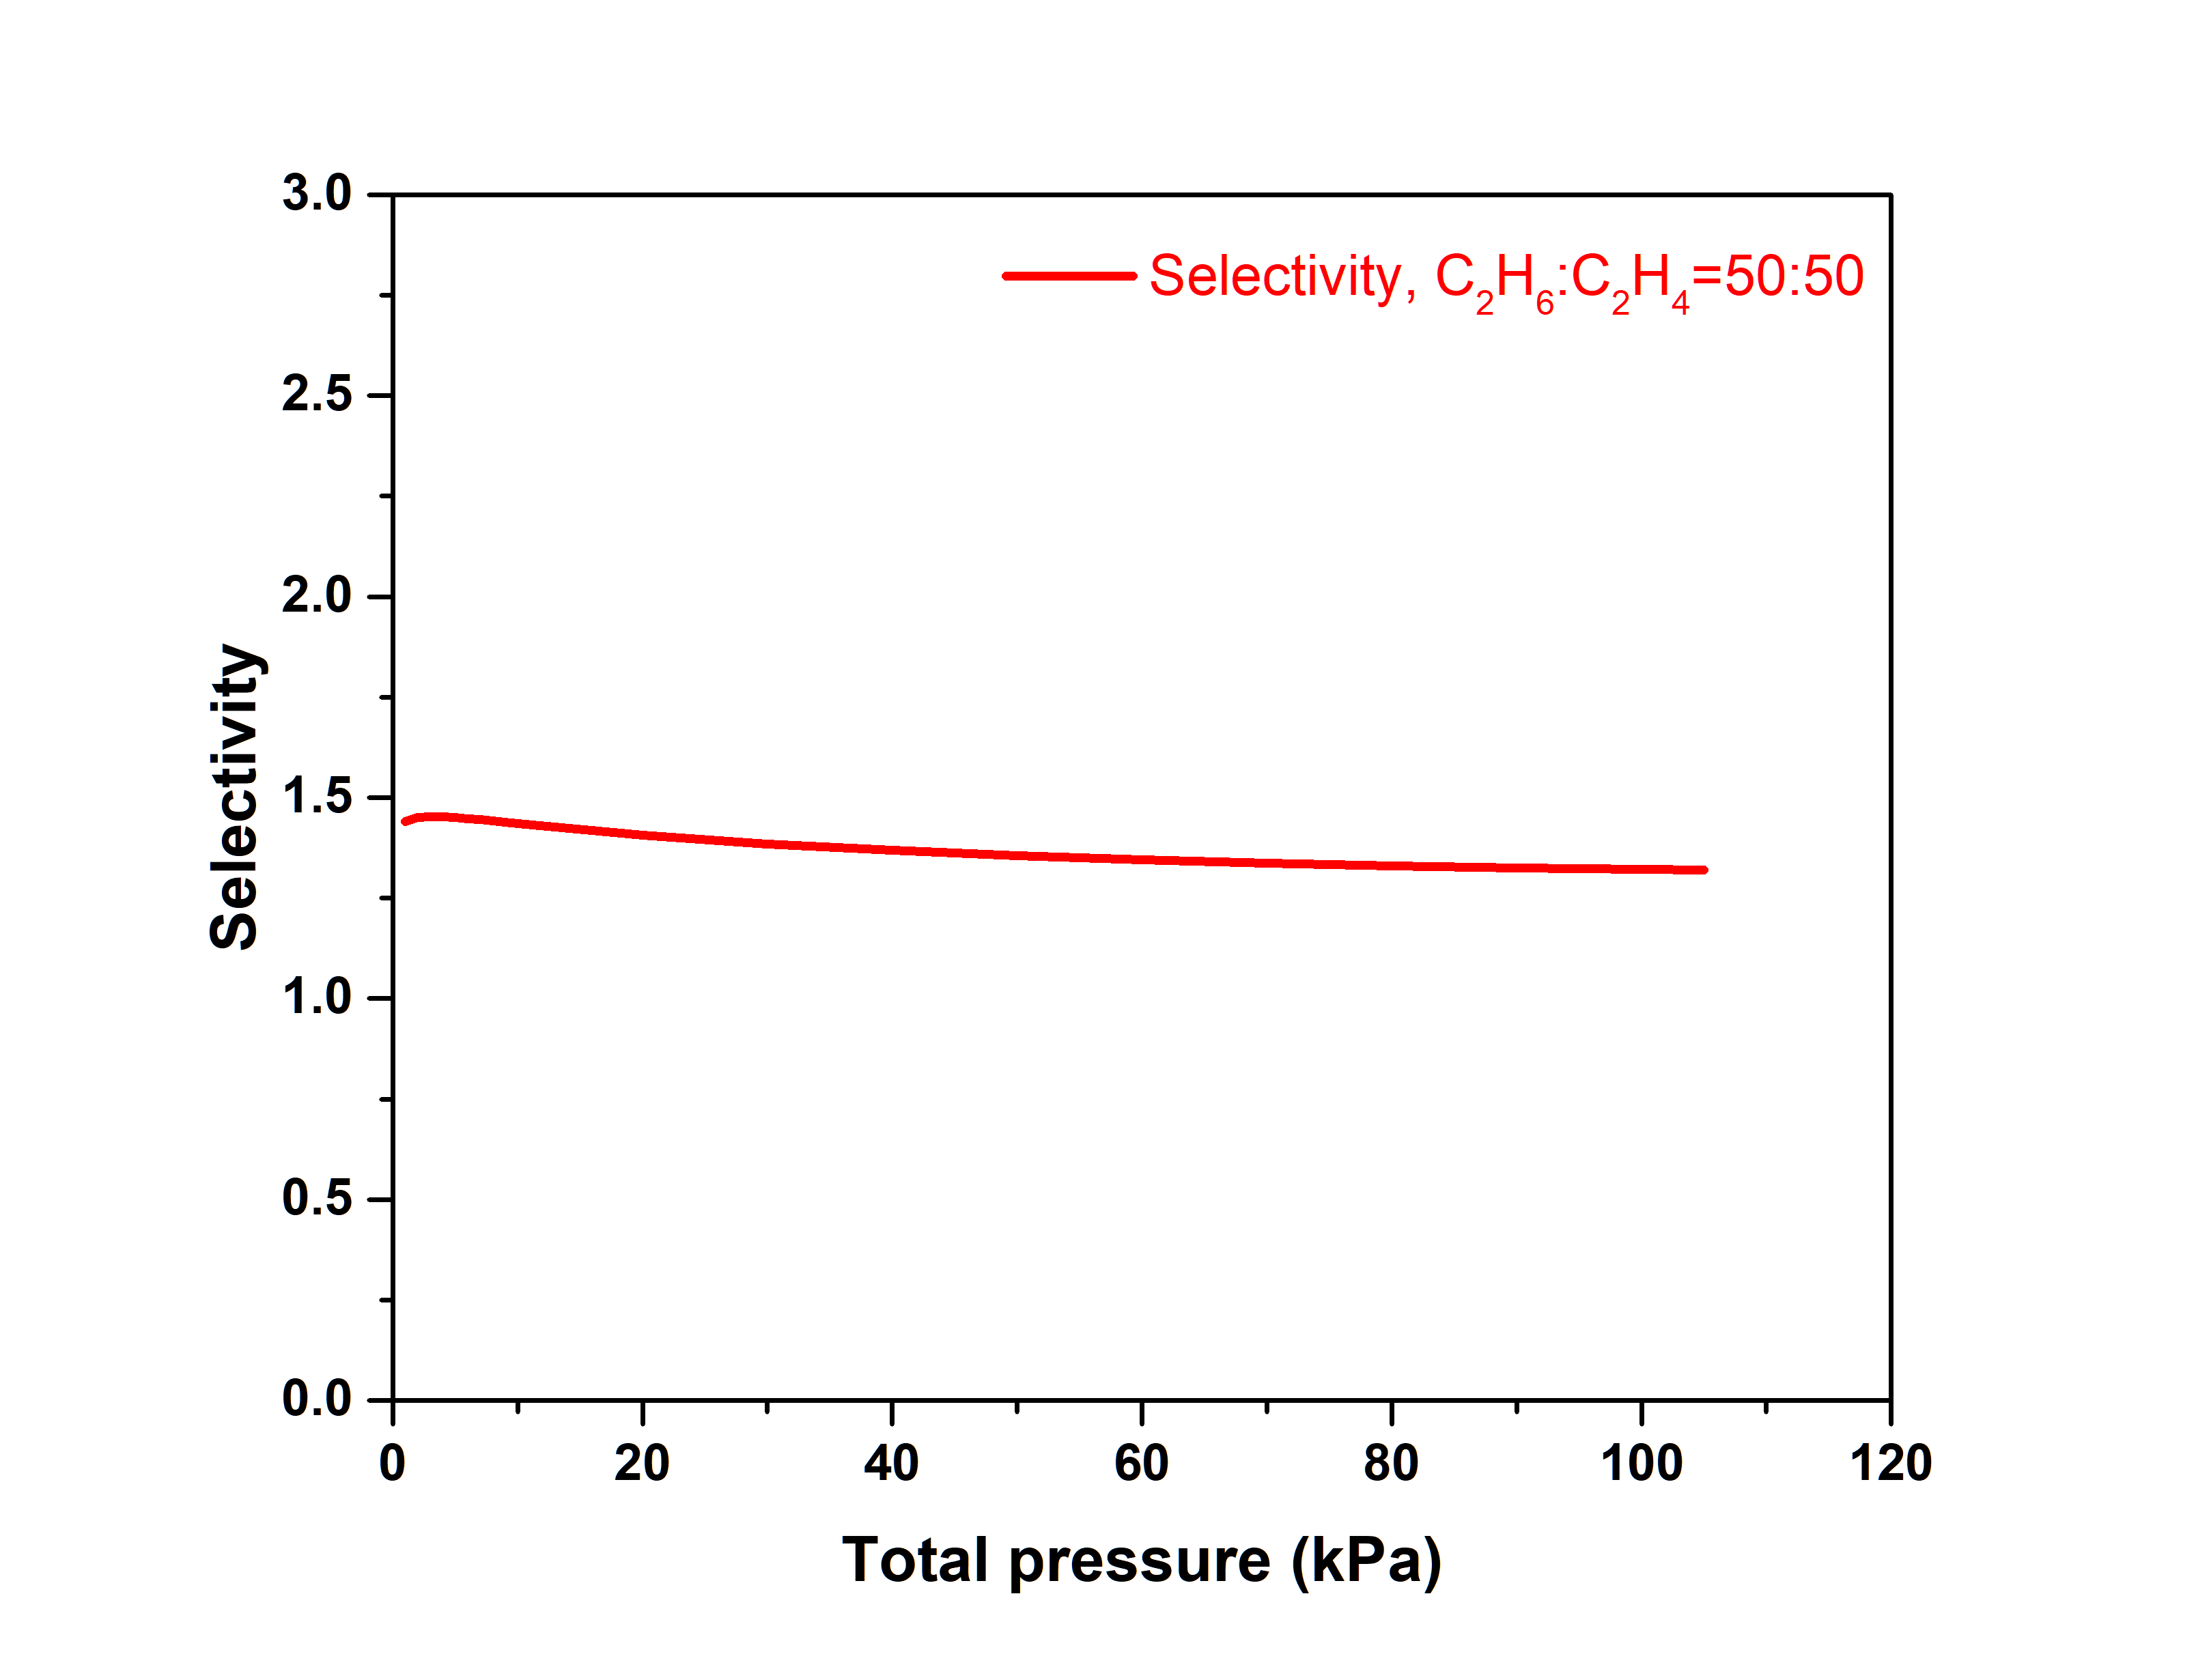


**Supplementary Fig. 11** Selectivity of **CPOC-301** predicted by the IAST method for an equimolar C2H6/C2H4 mixture at 293 K.


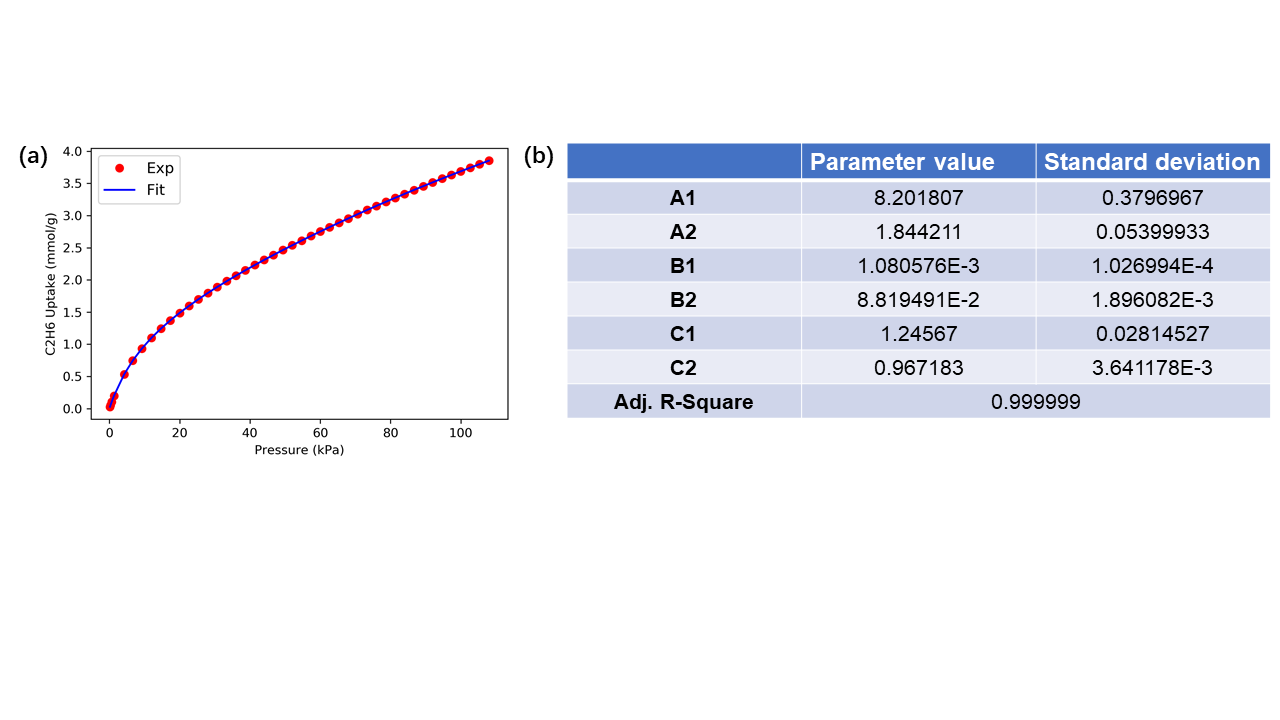


**Supplementary Fig. 12** Dual-site Langmuir-Freundlich fitting of the C2H6 adsorption isotherm of **CPOC-301** at 293 K. (b) Relevant fitting parameters for C2H6.


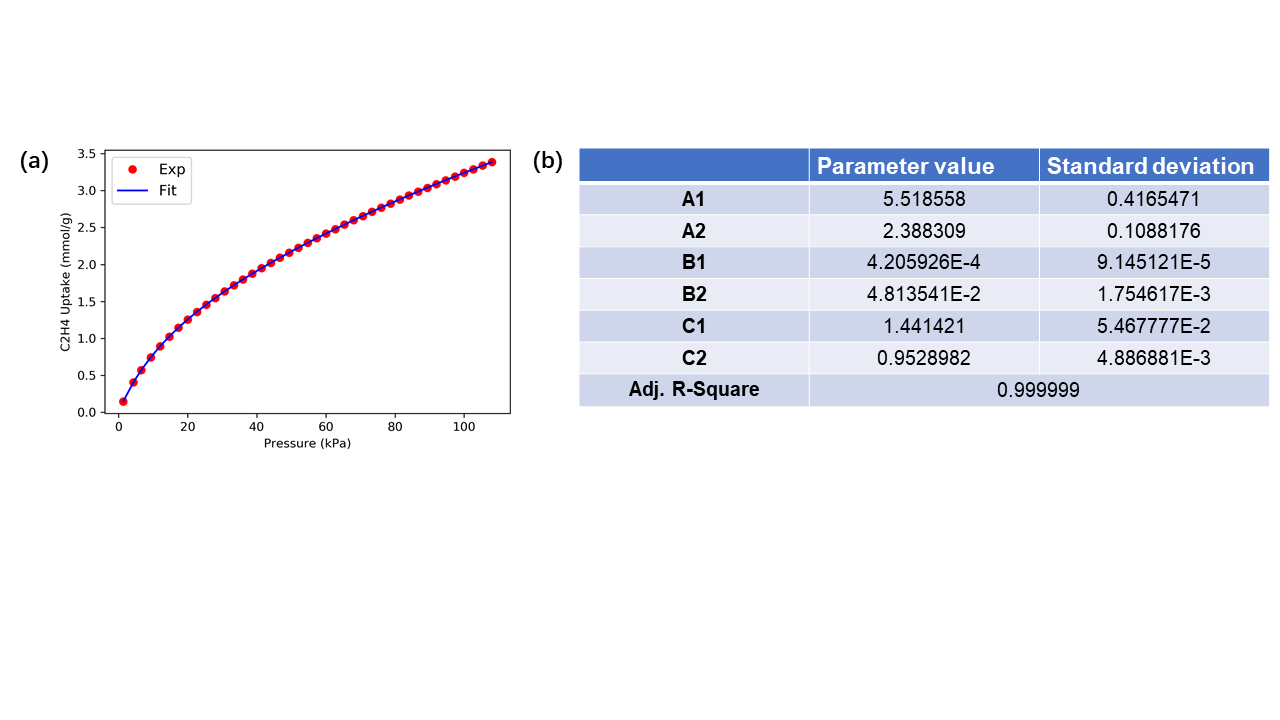


**Supplementary Fig. 13** Dual-site Langmuir-Freundlich fitting of the C2H4 adsorption isotherm of **CPOC-301** at 293 K. (b) Relevant fitting parameters for C2H4.


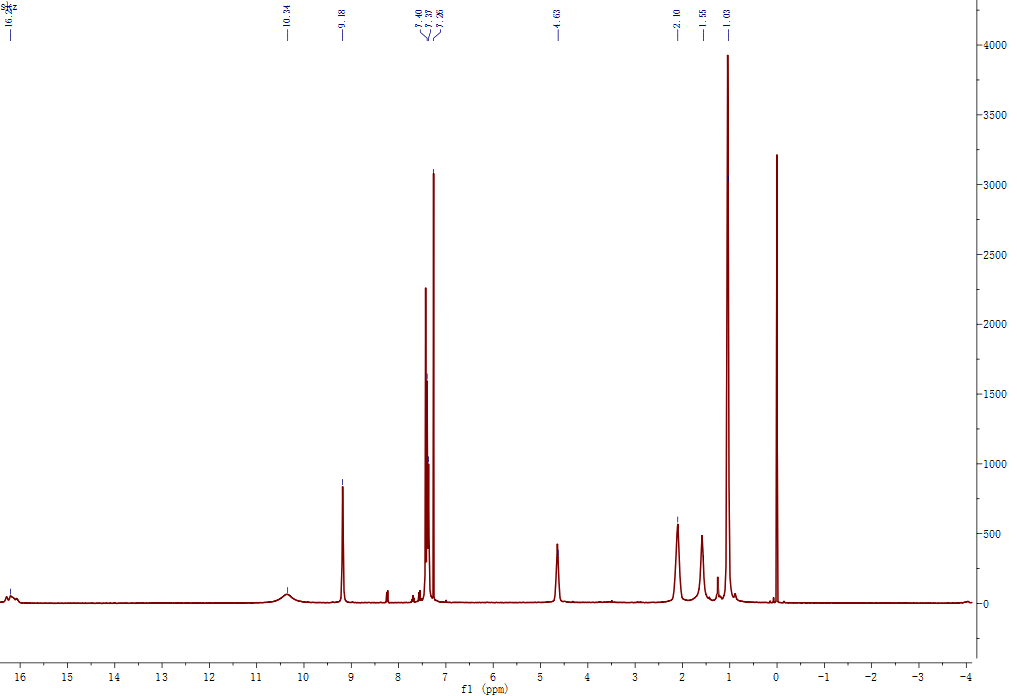


**Supplementary Fig. 14** 1HNMR of **CPOC-301** after breakthrough experiments (CDCl3, 400 MHz, 298 K).





**Supplementary Fig. 15** PXRD of **CPOC-301** after breakthrough experiments.


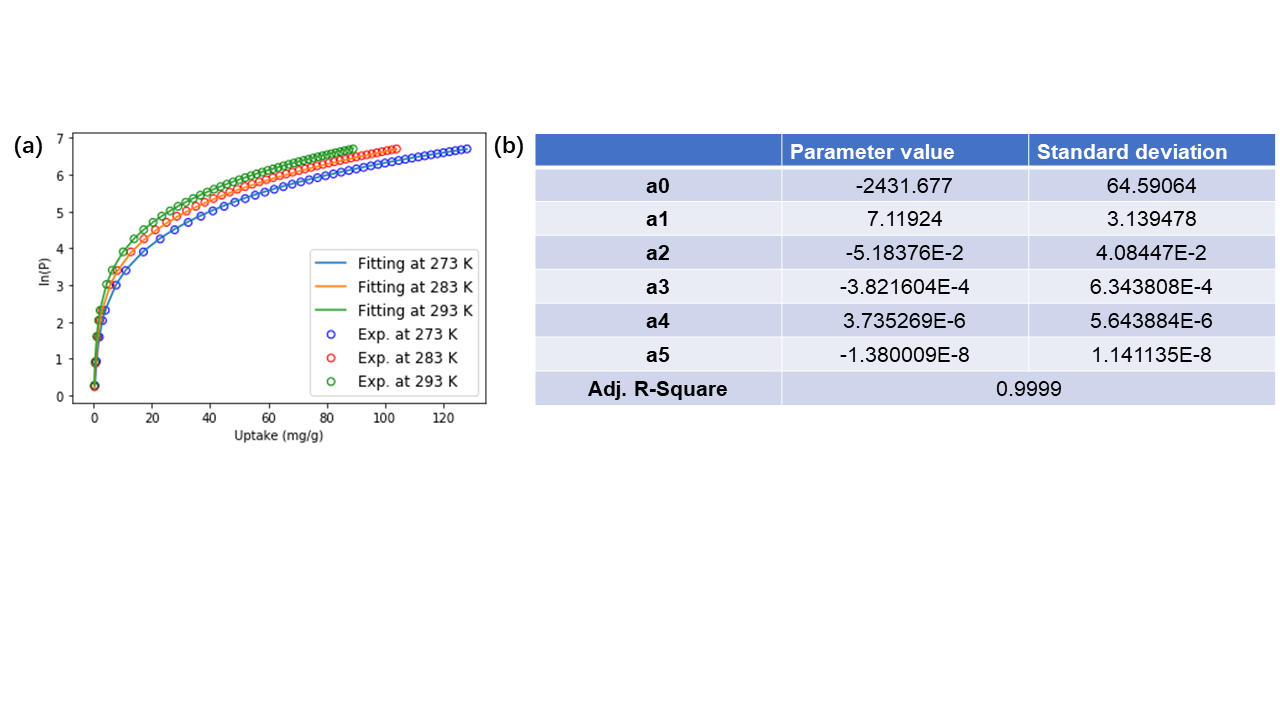


**Supplementary Fig. 16** (a) Virial equation fitting of the C2H2 adsorption isotherm of **CPOC-301** at 273, 283 and 293 K. (b) Relevant fitting parameters for C2H2.
