# Supplementary material for: Efficient ethylene purification by a robust ethane-trapping porous organic cage
Source: Research Square preprint supplement (doi:10.21203/rs.3.rs-98247/v1), 2020-11-04
Supplement: Supplementary file 1 [file e13ce332d7d59835ce6e9c33.pdf]

**Efficient ethylene purification by a robust ethane-trapping porous organic cage**

Kongzhao Su<sup>1,2,4</sup>, Wenjing Wang<sup>1,4</sup>, Shunfu Du<sup>1,3</sup>, Chunqing Ji<sup>1,2</sup> & Daqiang Yuan<sup>1,2,\*</sup>

<sup>1</sup>State Key Laboratory of Structure Chemistry, Fujian Institute of Research on the Structure of Matter, Chinese Academy of Sciences, Fuzhou, 350002 Fujian, China

<sup>2</sup>University of the Chinese Academy of Sciences, Beijing, 100049, China

<sup>3</sup>College of Chemistry, Fuzhou University, Fuzhou, 350116, China

<sup>4</sup>These authors contributed equally

Corresponding author. *E-mail address*: [ydq@fjirsm.ac.cn](mailto:ydq@fjirsm.ac.cn) (D.Q. Yuan).

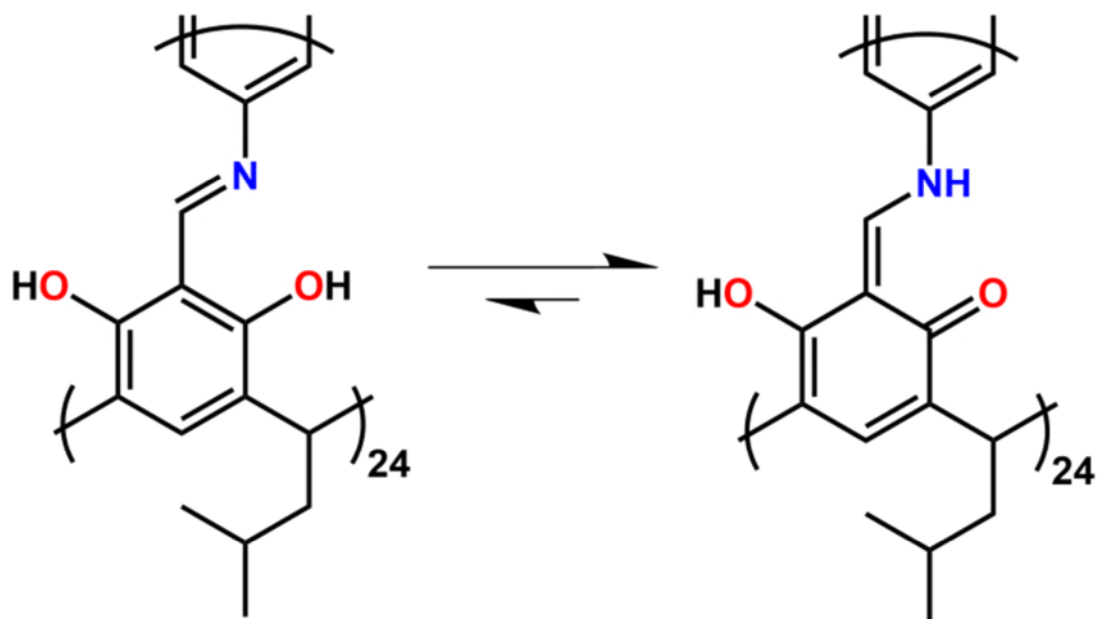

**Supplementary Fig. 1** Keto–enol tautomerization within **CPOC-301**.

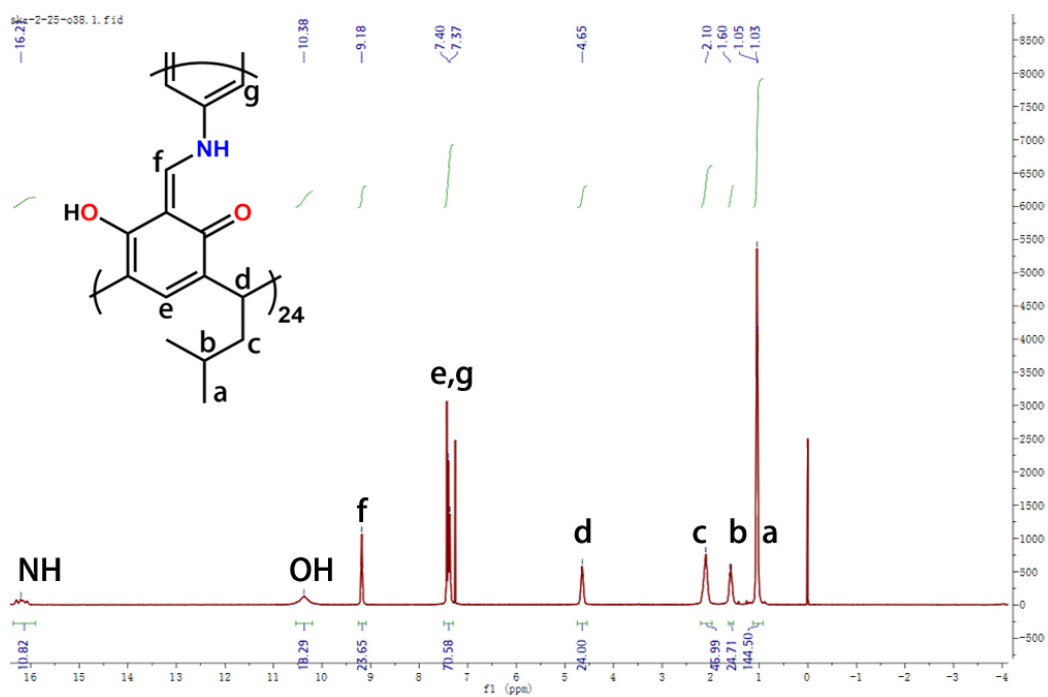

**Supplementary Fig. 2**  $^1\text{H}$ NMR of **CPOC-301** ( $\text{CDCl}_3$ , 400 MHz, 298 K). The lower integral areas at 10.38 and 16.21 ppm are due to the active hydrogen atoms.

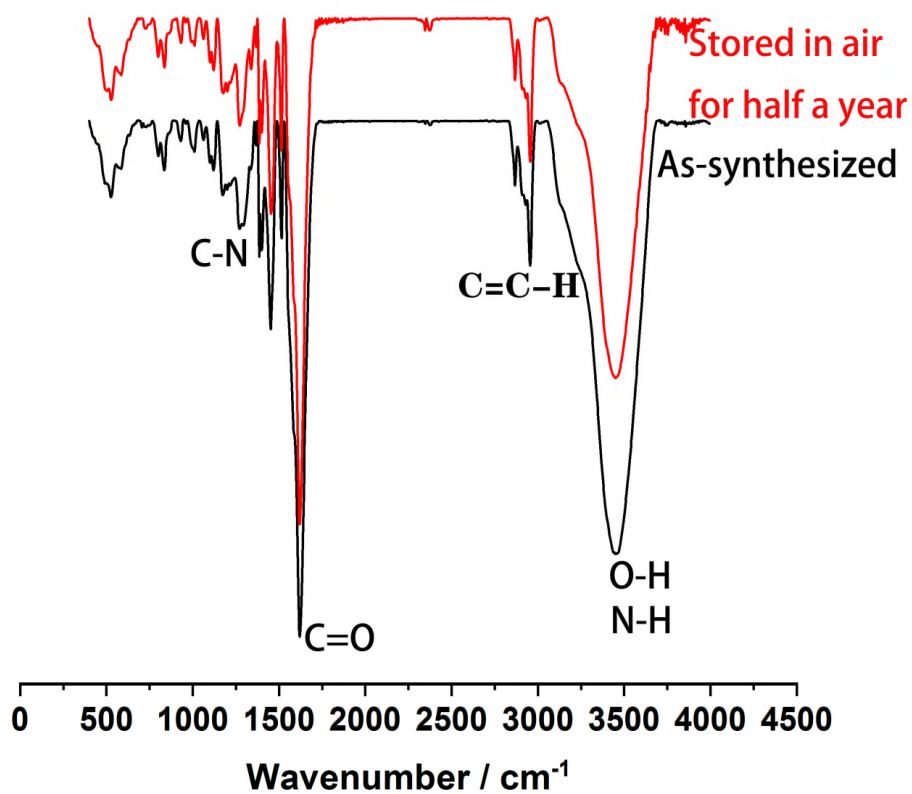

**Supplementary Fig. 3** FT-IR spectra of **CPOC-301**.

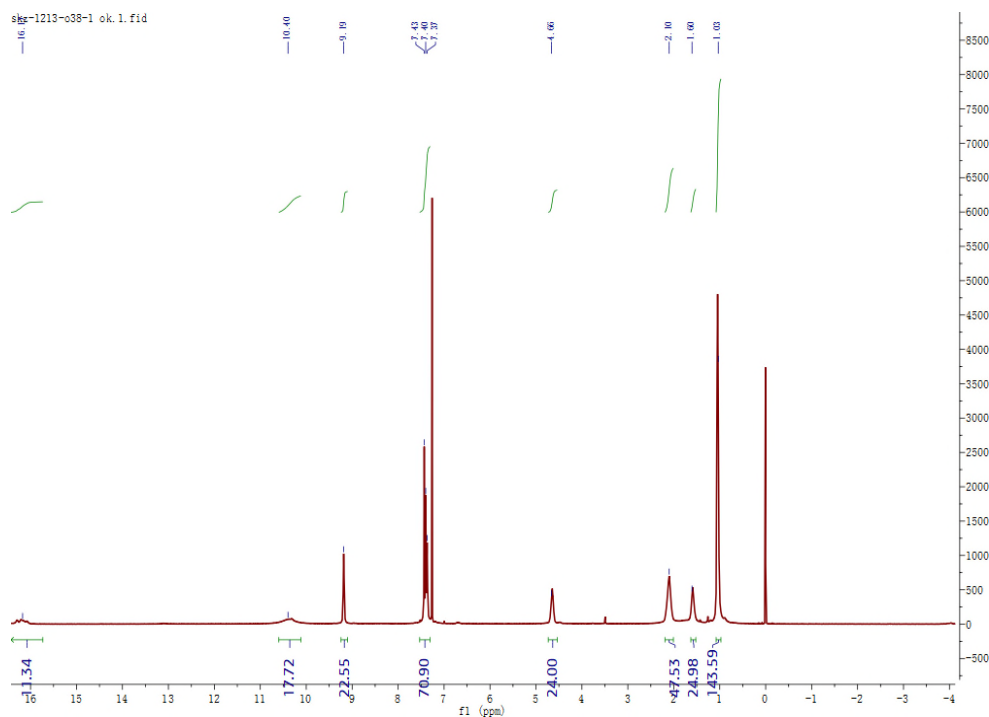

**Supplementary Fig. 4**  $^1\text{H}$ NMR of **CPOC-301** after storing in air for half a year ( $\text{CDCl}_3$ , 400 MHz, 298 K). The lower integral areas at 10.40 and 16.19 ppm are due to the active hydrogen atoms.

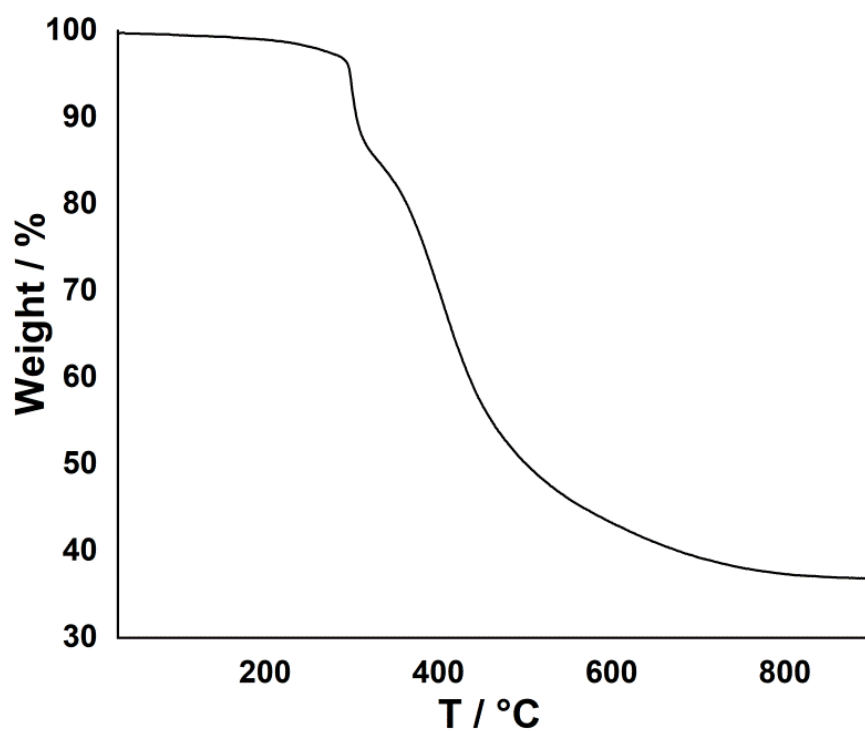

Supplementary Fig. 5 TGA curve of CPOC-301.

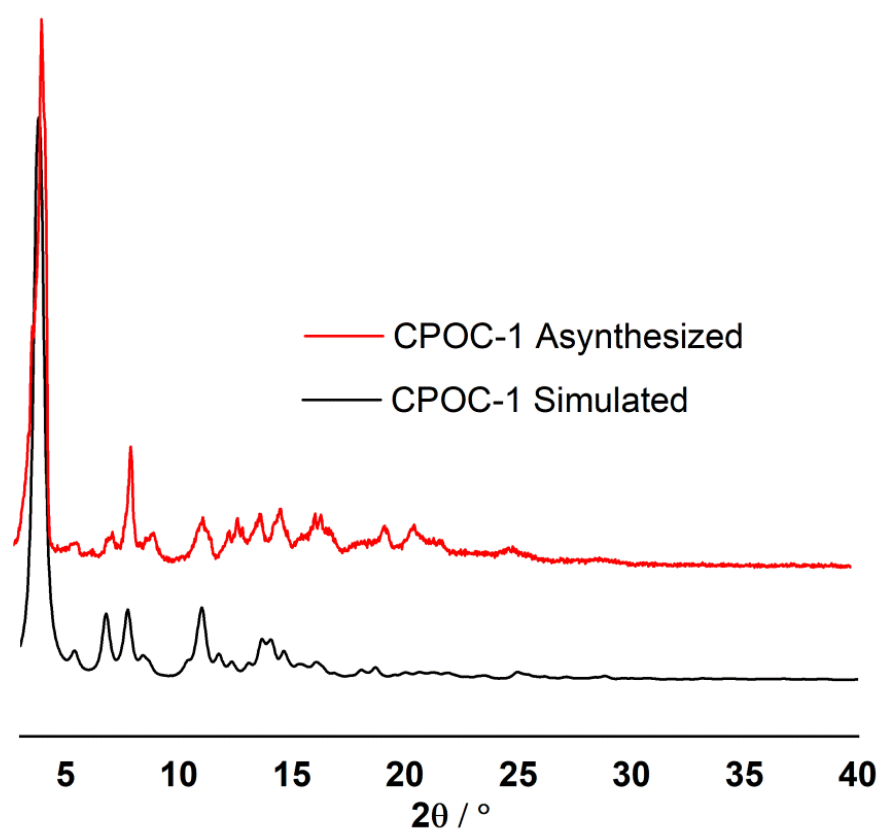

Supplementary Fig. 6 PXRD pattern of CPOC-301.

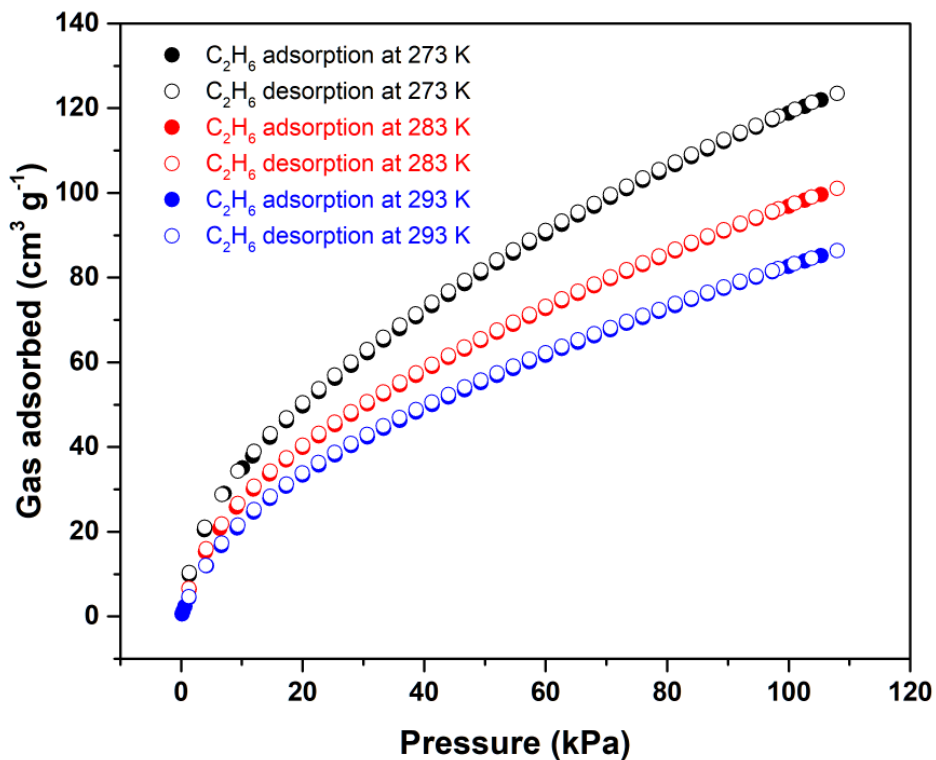

Supplementary Fig. 7  $C_2H_6$  adsorption/desorption isotherm of CPOC-301 at 273, 283 and 293 K.

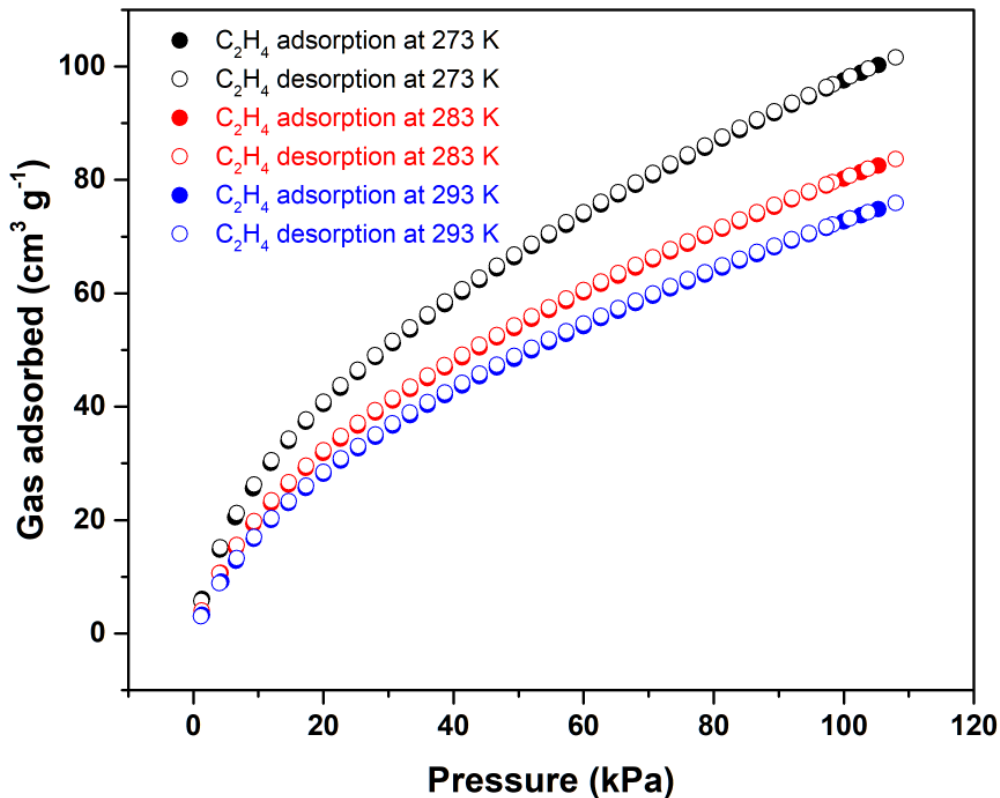

Supplementary Fig. 8  $C_2H_4$  adsorption/desorption isotherm of CPOC-301 at 273, 283 and 293 K.

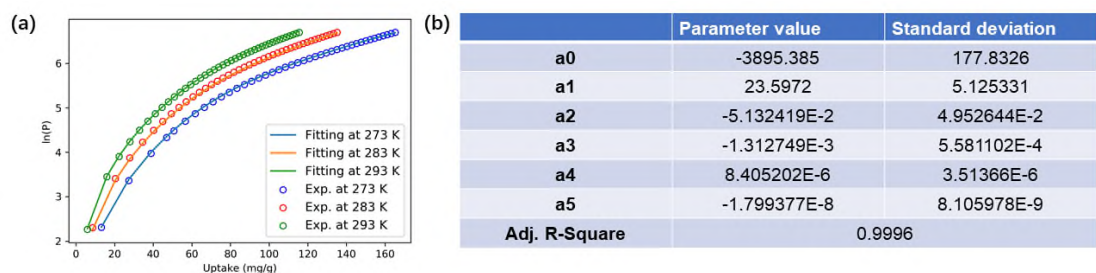

**Supplementary Fig. 9** (a) Virial equation fitting of the  $C_2H_6$  adsorption isotherm of CPOC-301 at 273, 283 and 293 K. (b) Relevant fitting parameters for  $C_2H_6$ .

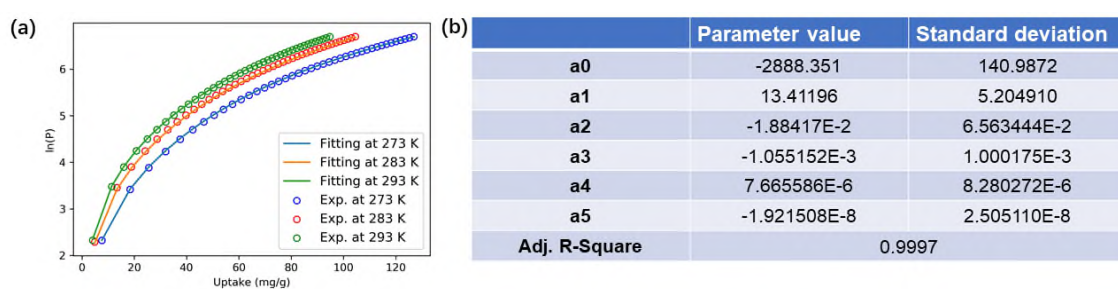

**Supplementary Fig. 10** (a) Virial equation fitting of the  $C_2H_4$  adsorption isotherm of CPOC-301 at 273, 283 and 293 K. (b) Relevant fitting parameters for  $C_2H_4$ .

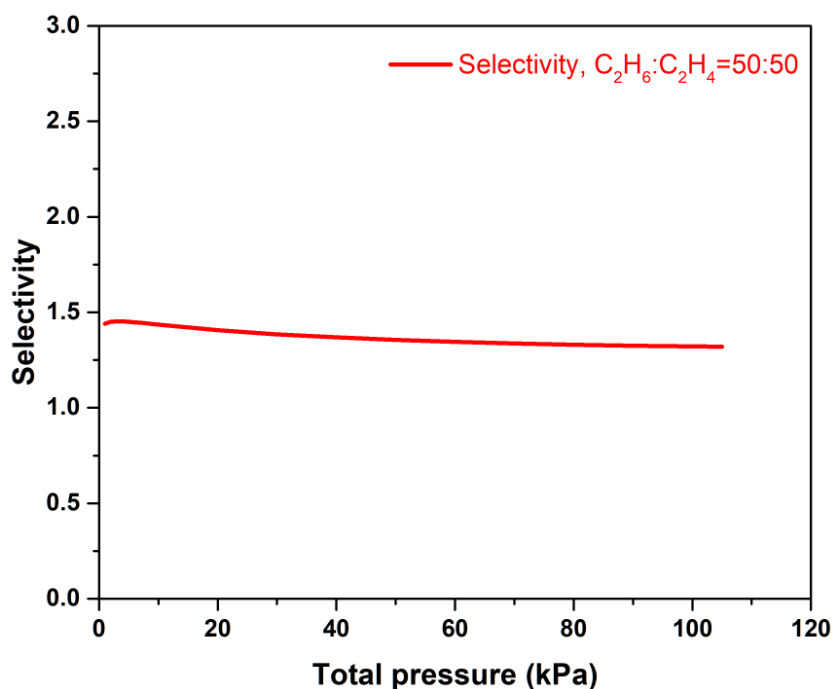

**Supplementary Fig. 11** Selectivity of CPOC-301 predicted by the IAST method for an equimolar  $C_2H_6/C_2H_4$  mixture at 293 K.

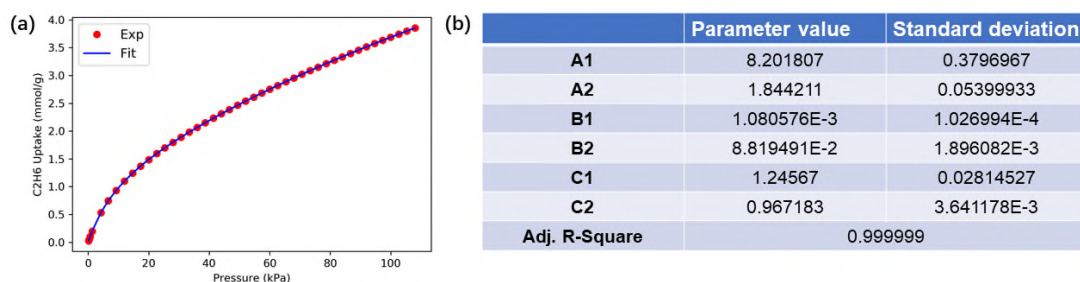

**Supplementary Fig. 12** Dual-site Langmuir-Freundlich fitting of the  $C_2H_6$  adsorption isotherm of **CPOC-301** at 293 K. (b) Relevant fitting parameters for  $C_2H_6$ .

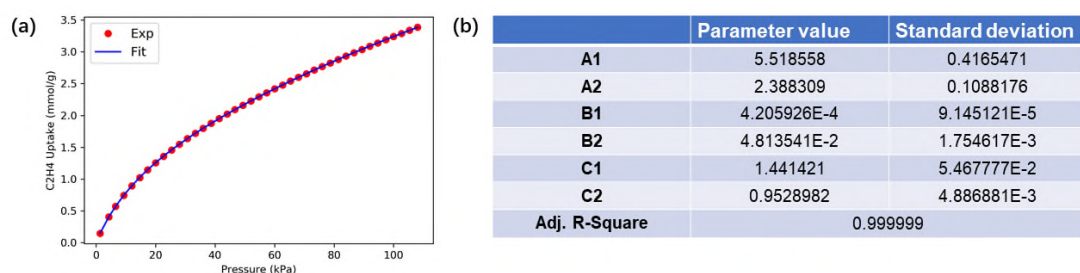

**Supplementary Fig. 13** Dual-site Langmuir-Freundlich fitting of the  $C_2H_4$  adsorption isotherm of **CPOC-301** at 293 K. (b) Relevant fitting parameters for  $C_2H_4$ .

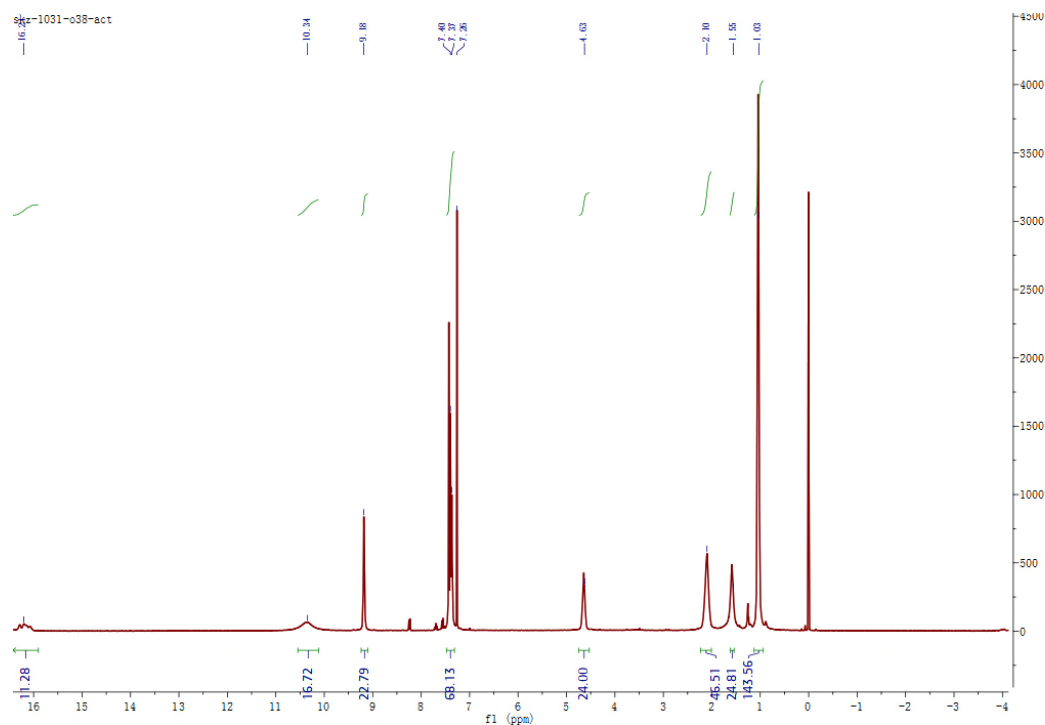

**Supplementary Fig. 14**  $^1H$ NMR of **CPOC-301** after breakthrough experiments ( $CDCl_3$ , 400 MHz, 298 K). The lower integral areas at 10.34 and 16.21 ppm are due to the active hydrogen atoms.

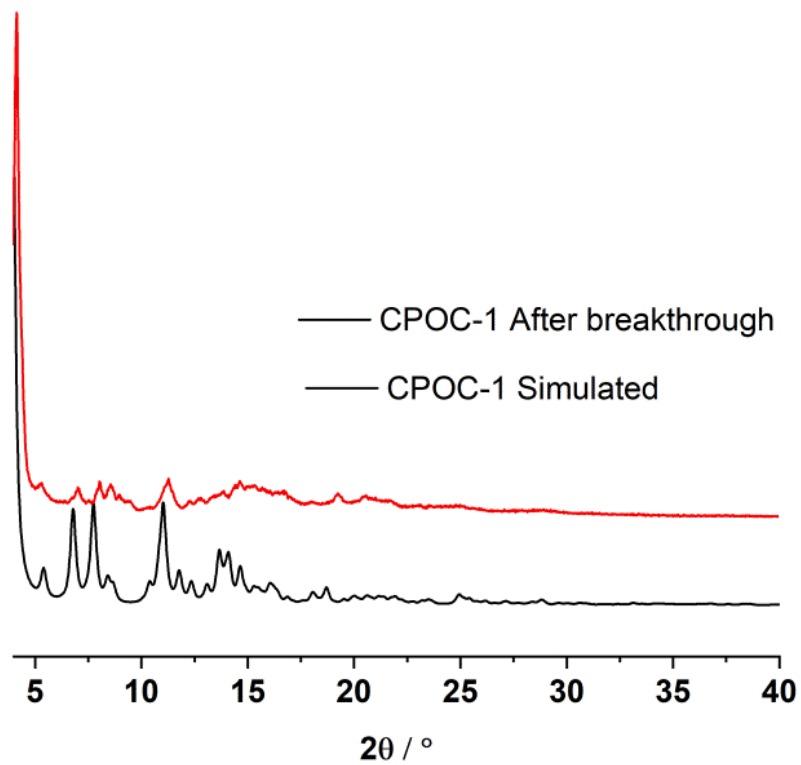

**Supplementary Fig. 15** PXRD of CPOC-301 after breakthrough experiments.

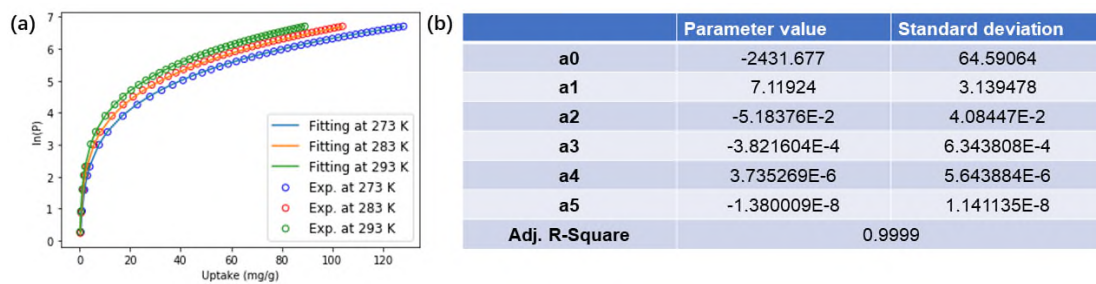

**Supplementary Fig. 16** (a) Virial equation fitting of the  $C_2H_2$  adsorption isotherm of CPOC-301 at 273, 283 and 293 K. (b) Relevant fitting parameters for  $C_2H_2$ .
